# Supplementary material
Source: publisher figshare collection journal article supplement (https://acs.figshare.com/ndownloader/files/14862398)
Supplement: Supplementary file 1 [file 14862398]

# **Importance of Exsolution in Transition Metal (Co, Rh, and Ir)-doped LaCrO<sub>3</sub> Perovskite Catalysts for Boosting Dry Reforming of CH<sub>4</sub> Using CO<sub>2</sub> for Hydrogen Production**

Joo Hyeng Oh,<sup>†,§</sup> Byeong Wan Kwon,<sup>†</sup> Jinwon Cho,<sup>†</sup> Chan Hyun Lee,<sup>†</sup> Min Kyeong Kim,<sup>†</sup>  
Sun Hee Choi,<sup>†,‡</sup> Sung Pil Yoon,<sup>†,‡</sup> Jonghee Han,<sup>†</sup> Suk Woo Nam,<sup>†</sup> Ki Bong Lee<sup>\*,§</sup> and  
Hyung Chul Ham<sup>\*,†,‡</sup>

<sup>†</sup>Fuel Cell Research Center, Korea Institute of Science and Technology, 5 Hwarang-ro 14-gil,  
Seongbuk-gu, Seoul 02792, Republic of Korea

<sup>§</sup>Department of Chemical and Biological Engineering, Korea University, 145 Anam-ro,  
Seongbuk-gu, Seoul 02841, Republic of Korea

<sup>‡</sup>Division of Energy & Environment Technology, KIST School, Korea University of Science  
and Technology (UST), Seoul 02792, Republic of Korea

\*Corresponding Author: (K.B. Lee) Tel. +82 2 3290 4851; Fax: +82 2 926 6102; E-mail:  
kibonglee@korea.ac.kr; (H.C. Ham) Tel. +82 2 958 5889; Fax: +82 2 958 5199; E-mail:  
hchahm@kist.re.kr.

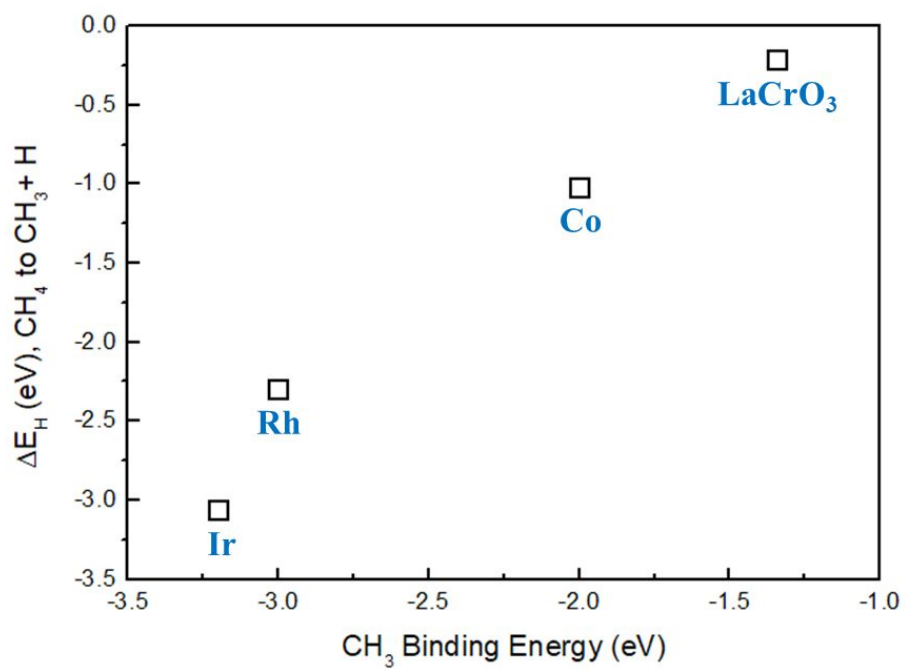

**Figure S1.** Reaction energies of the dehydrogenation of CH<sub>4</sub> versus CH<sub>3</sub> binding energies.

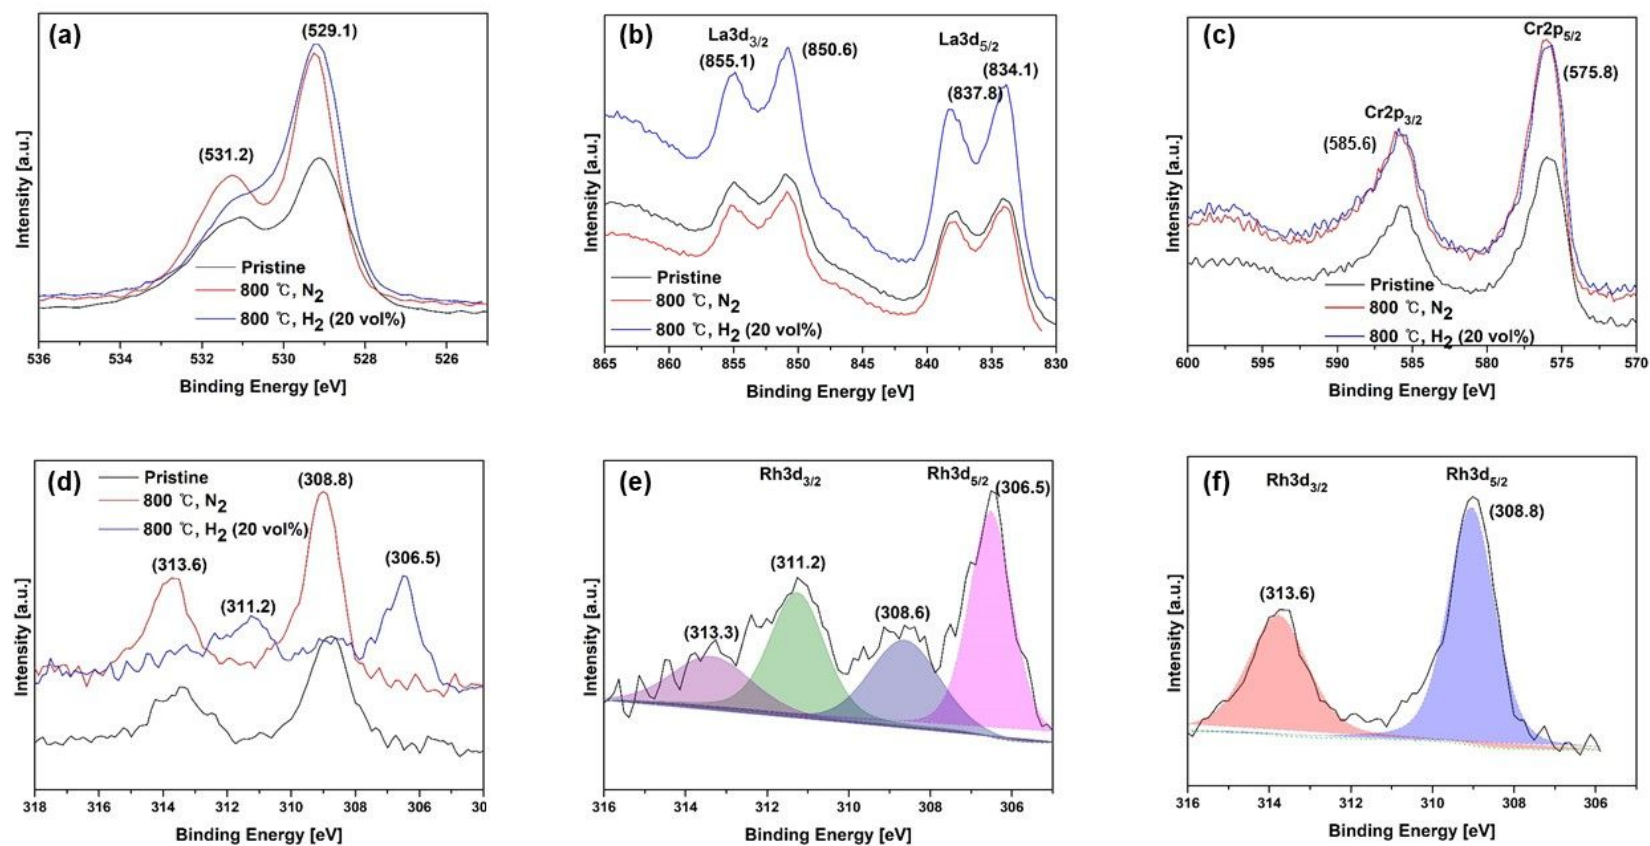

**Figure S2.** XPS spectra of  $\text{LaCr}_{0.95}\text{Rh}_{0.05}\text{O}_{3-\delta}$  perovskite-based catalyst: (a) O1s, (b) La3d, (c) Cr2p, (d) Rh3d core-line spectra and curved-fitted Rh3d spectra after treated at 800 °C under (e)  $\text{N}_2$  and (f)  $\text{H}_2$  (20 vol%) conditions.

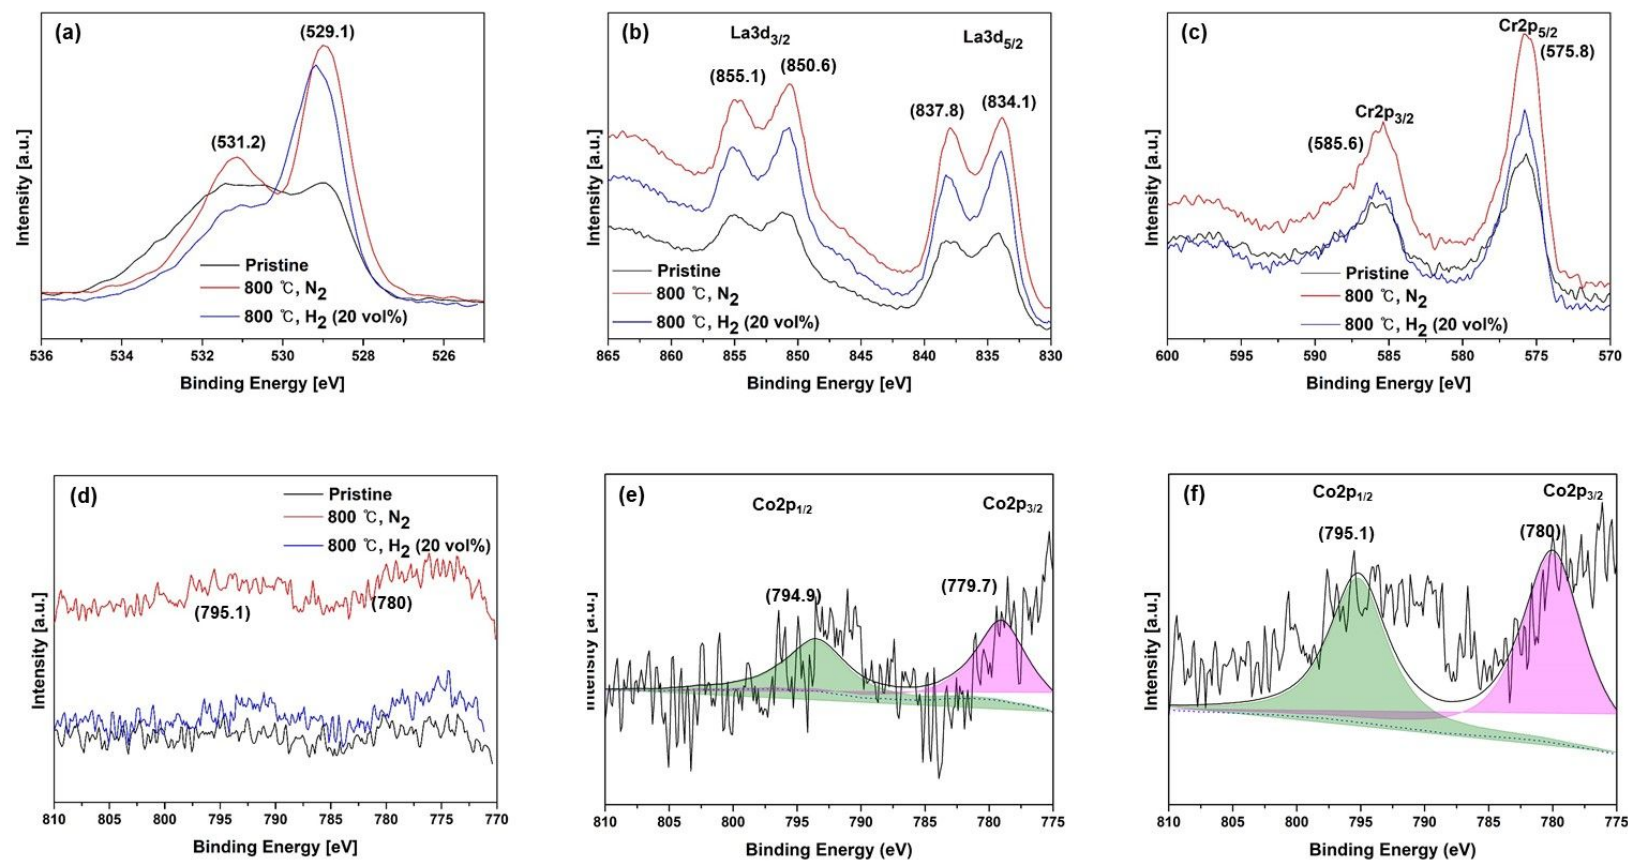

**Figure S3.** XPS spectra of LaCr<sub>0.95</sub>Co<sub>0.05</sub>O<sub>3-δ</sub> perovskite-based catalyst: (a) O 1s, (b) La 3d, (c) Cr 2p, (d) Co 2p core-line spectra after the heat treatment at 800 °C under (e) N<sub>2</sub> and (f) H<sub>2</sub> (20 vol%) conditions.

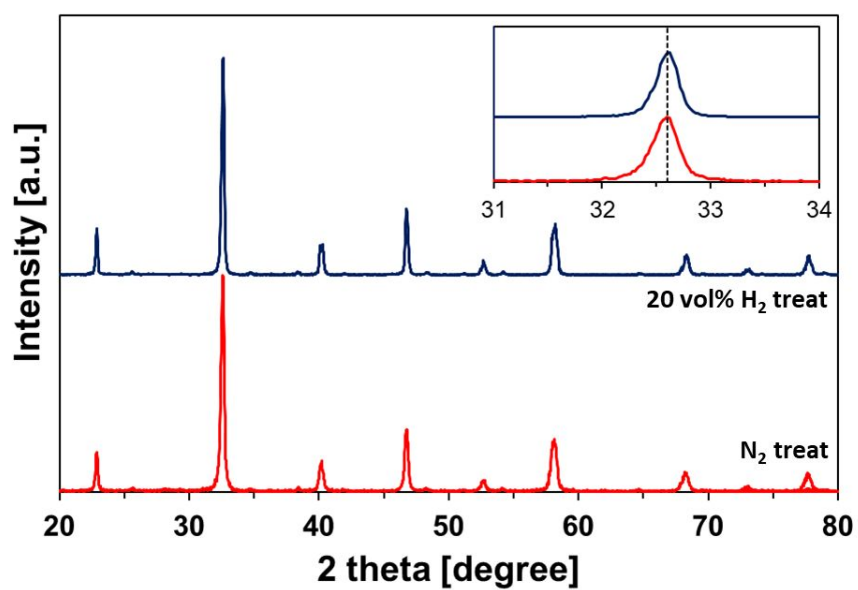

**Figure S4.** X-ray diffraction spectra of  $\text{LaCr}_{0.95}\text{Ir}_{0.05}\text{O}_{3-\delta}$  after  $\text{N}_2$  or 20 vol%  $\text{H}_2$  (balanced with  $\text{N}_2$ ) treatment. Inset: Detailed XRD spectrum between  $31^\circ$  and  $34^\circ$ .

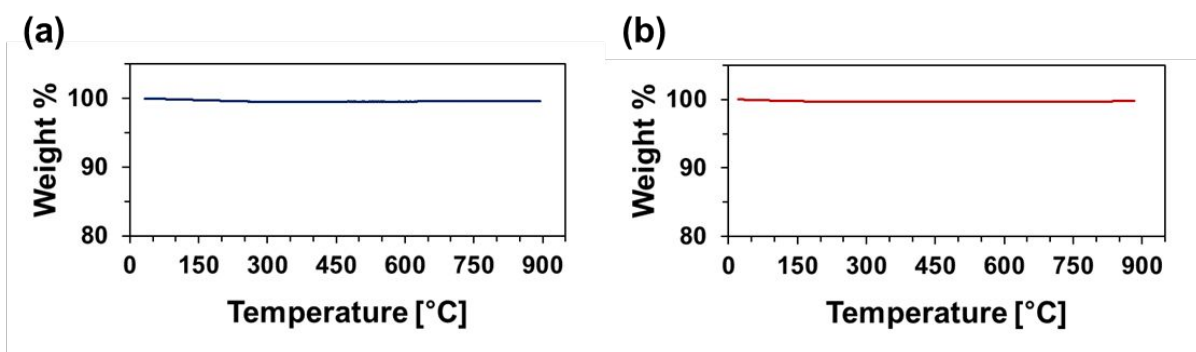

**Figure S5.** Thermogravimetric analysis of  $\text{H}_2$  treated  $\text{LaCr}_{0.95}\text{Ir}_{0.05}\text{O}_{3-\delta}$  perovskite-based catalyst at (a) before and (b) after the dry reforming reaction of  $\text{CH}_4$  using  $\text{CO}_2$  at 750 °C.

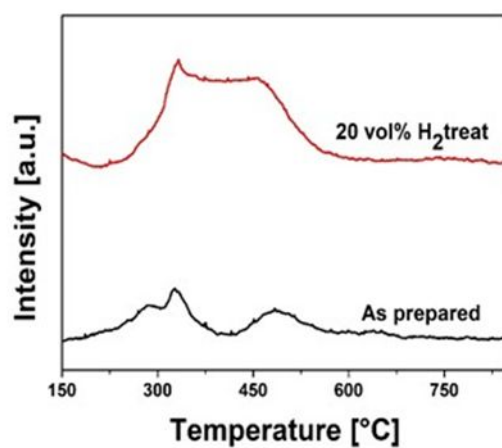

**Figure S6.** H<sub>2</sub>-TPR profile of LaCr<sub>0.95</sub>Ir<sub>0.05</sub>O<sub>3-δ</sub> at before/after activation under 20 vol% H<sub>2</sub> (balanced with N<sub>2</sub>) treatment.
